# Supplementary material for: When Is the Right Moment to Pick Blueberries? Variation in Agronomic and Chemical Properties of Blueberry (Vaccinium corymbosum) Cultivars at Different Harvest Times
Source: MDPI journal article supplement (doi:10.3390/metabo12090798), 2022-08-26
Supplement: s1 [file s1]

**Table S1.** Chemical parameters used for Principal component analysis

| N  |                         |       |       |        |       |        |       |       |       |        |       |       |       |
|----|-------------------------|-------|-------|--------|-------|--------|-------|-------|-------|--------|-------|-------|-------|
| o. | Chemical parameters     | D1    | D2    | D3     | D4    | C1     | C2    | C3    | C4    | BC1    | BC2   | BC3   | BC4   |
| 1  | RSA                     | 27.64 | 29.66 | 27.78  | 24.83 | 25.91  | 24.71 | 26.02 | 26.16 | 29.07  | 29.05 | 29.98 | 29.02 |
| 2  | TPC                     | 2.52  | 2.52  | 2.35   | 1.45  | 1.78   | 1.64  | 1.74  | 1.61  | 2.51   | 2.21  | 1.86  | 1.98  |
| 3  | TAC                     | 1.65  | 1.75  | 1.61   | 0.49  | 0.97   | 0.78  | 0.96  | 0.73  | 1.34   | 0.95  | 0.56  | 0.71  |
| 4  | Aesculin                | 0.467 | 0.661 | 1.276  | 0.302 | 0.455  | 0.277 | 0.297 | 0.348 | 0.463  | 0.774 | 0.398 | 0.440 |
| 5  | p-Hydroxybenzoic acid   | 0.000 | 0.000 | 0.000  | 0.000 | 11.048 | 0.970 | 4.693 | 6.058 | 3.407  | 4.080 | 8.238 | 6.702 |
|    | 5-O-Caffeoylquinic acid |       |       |        |       |        | 34.79 |       |       |        |       |       |       |
|    |                         | 6.405 | 2.789 | 2.191  | 8.737 | 3.746  | 3     | 3.241 | 7.584 | 3.202  | 6.493 | 9.982 | 3.589 |
| 7  | Caffeic acid            | 0.344 | 0.283 | 0.566  | 0.285 | 0.709  | 0.318 | 0.284 | 0.187 | 0.552  | 0.279 | 0.271 | 0.449 |
| 8  | Aesculetin              | 0.378 | 0.451 | 0.630  | 0.555 | 0.833  | 0.230 | 0.252 | 0.356 | 0.549  | 0.330 | 0.419 | 0.569 |
| 9  | Rutin                   | 6.956 | 6.043 | 4.780  | 2     | 16.367 | 2     | 7     | 6     | 5.644  | 9     | 4     | 5     |
|    | Quercetin 3-O-          | 17.23 | 17.43 |        | 21.46 |        | 22.71 | 24.35 | 22.44 |        | 22.40 | 23.18 | 16.11 |
|    | glucoside               | 9     | 2     | 13.985 | 2     | 18.261 | 7     | 4     | 9     | 12.012 | 6     | 9     | 0     |
| 11 | Ellagic acid            | 0.000 | 0.000 | 0.000  | 0.000 | 0.708  | 0.000 | 0.298 | 0.000 | 0.000  | 0.000 | 0.000 | 0.000 |
| 12 | Kaempferol 3-O-         |       |       |        |       |        |       |       |       |        |       |       |       |
|    | glucoside               | 0.410 | 0.471 | 0.327  | 5.127 | 3.392  | 5.767 | 7.151 | 6.575 | 0.256  | 5.229 | 6.041 | 4.816 |
|    | Quercetin 3-O-          |       |       |        |       |        | 15.45 | 12.30 | 13.91 |        | 12.17 | 12.39 |       |
| 13 | rhamnoside              | 0.000 | 0.000 | 0.000  | 0.000 | 7.318  | 2     | 7     | 2     | 0.000  | 4     | 5     | 5.929 |
| 14 | Phlorizin               | 0.309 | 0.236 | 0.179  | 0.091 | 0.143  | 0.159 | 0.167 | 0.137 | 0.338  | 0.288 | 0.140 | 0.207 |
| 15 | Quercetin               | 62.99 | 85.85 | 119.13 | 69.04 | 130.78 | 47.12 | 90.86 | 57.26 | 136.39 | 81.96 | 72.34 | 92.89 |
|    |                         | 5     | 8     | 6      | 5     | 1      | 0     | 4     | 7     | 1      | 6     | 3     | 5     |
|    | Kaempferol              | 1.032 | 1.306 | 1.191  | 2.409 | 2.109  | 2.042 | 2.397 | 1.913 | 1.109  | 1.996 | 2.081 | 2.054 |
| 17 | Isorhamnetin            | 2.857 | 5.023 | 6.999  | 0.752 | 3.927  | 1.127 | 0.956 | 0.863 | 6.905  | 1.471 | 0.700 | 1.257 |
| 18 | Sorbitol                | 3.781 | 1.872 | 0.608  | 0.842 | 0.730  | 0.712 | 0.485 | 1.044 | 0.412  | 0.734 | 1.256 | 0.825 |
| 19 | Trehalose               | 0.019 | 0.001 | 0.004  | 0.009 | 0.003  | 0.002 | 0.002 | 0.004 | 0.001  | 0.003 | 0.000 | 0.001 |
| 20 | Glucose                 | 44.47 | 39.85 |        | 27.74 |        | 26.51 | 22.42 | 24.58 |        | 24.80 | 38.28 | 36.77 |
|    |                         | 1     | 9     | 24.708 | 9     | 26.864 | 6     | 4     | 6     | 28.632 | 9     | 7     | 5     |
|    |                         | 32.65 | 28.12 |        | 19.19 |        | 33.97 | 27.08 | 24.90 |        | 24.99 | 37.82 | 31.96 |
| 21 | Fructose                | 9     | 4     | 15.159 | 7     | 33.680 | 8     | 0     | 8     | 29.396 | 3     | 0     | 0     |
| 22 | Sucrose                 | 2.267 | 1.564 | 1.209  | 1.097 | 1.844  | 1.731 | 0.922 | 1.015 | 0.682  | 0.850 | 1.023 | 1.071 |
| 23 | Isomaltose              | 0.077 | 0.003 | 0.002  | 0.001 | 0.002  | 0.001 | 0.001 | 0.001 | 0.002  | 0.003 | 0.002 | 0.001 |
| 24 | Turanose                | 0.088 | 0.125 | 0.038  | 0.002 | 0.002  | 0.002 | 0.003 | 0.003 | 0.005  | 0.008 | 0.003 | 0.004 |
| 25 | Gentiobiose             | 0.002 | 0.002 | 0.001  | 0.000 | 0.000  | 0.000 | 0.000 | 0.001 | 0.000  | 0.000 | 0.000 | 0.000 |
| 26 | Maltose                 | 0.144 | 0.061 | 0.026  | 0.028 | 0.071  | 0.027 | 0.017 | 0.049 | 0.123  | 0.196 | 0.073 | 0.126 |
| 27 | Maltotriose             | 0.036 | 0.025 | 0.018  | 0.031 | 0.073  | 0.038 | 0.037 | 0.090 | 0.028  | 0.057 | 0.020 | 0.329 |
